# Supplementary material
Source: PubMed Central journal article supplement (PMC5753800)
Supplement: NIHMS926100-supplement-1.pdf [file NIHMS926100-supplement-1.pdf]

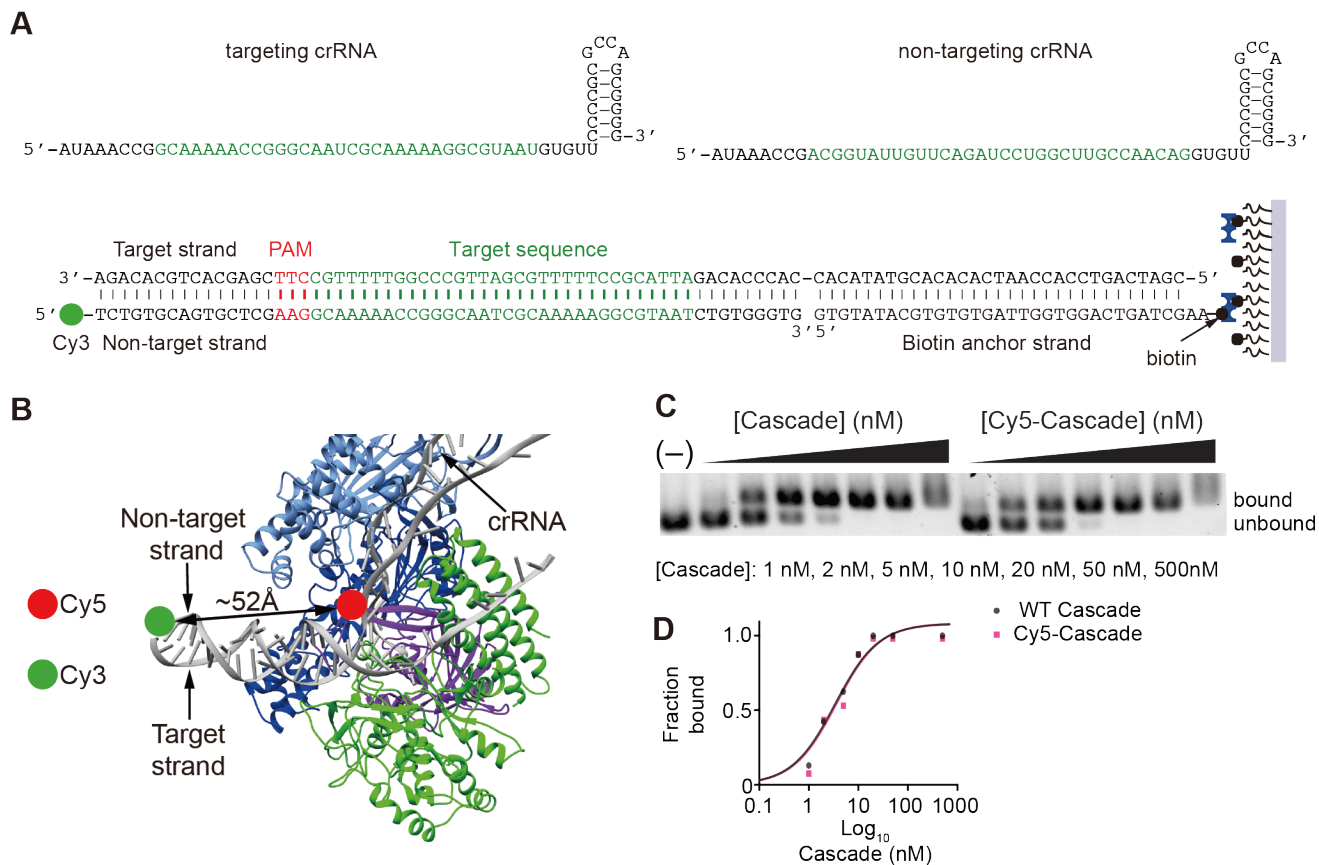

**Figure S1. Development of smFRET assay. Related to Figure 1.**

(A) Schematic of two crRNAs correspond to targeting Cascade and non-targeting Cascade and a surface-immobilized, Cy3 labelled dsDNA that contains the target sequence (green) and the PAM (red). A 33-nt biotinylated adaptor is used as an anchor for surface immobilization. (B) Cy3 (green dot) and Cy5 (red dot) labelling locations shown in the Cascade-dsDNA bound crystal structure (PDB ID: 5H9F). (C) Electrophoretic mobility shift assay for WT Cascade and Cy5 labelled Cascade (labelling efficiency > 90%) (1, 2, 5, 10, 20, 50, and 500 nM) binding to plasmid containing target sequence. (D) Fraction of DNA bound versus Cascade concentration were fit with a binding isotherm (solid lines).

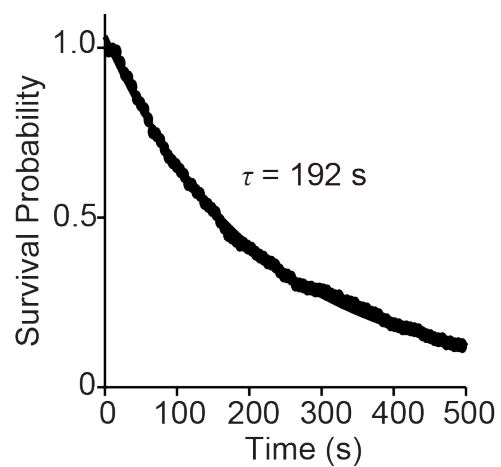

**Figure S2. Photobleaching rate for Cy3-labeled dsDNA. Related to Figures 1 and 2**

Mean donor photobleaching time was obtained from fitting donor survival probability to a single-exponential decay equation.

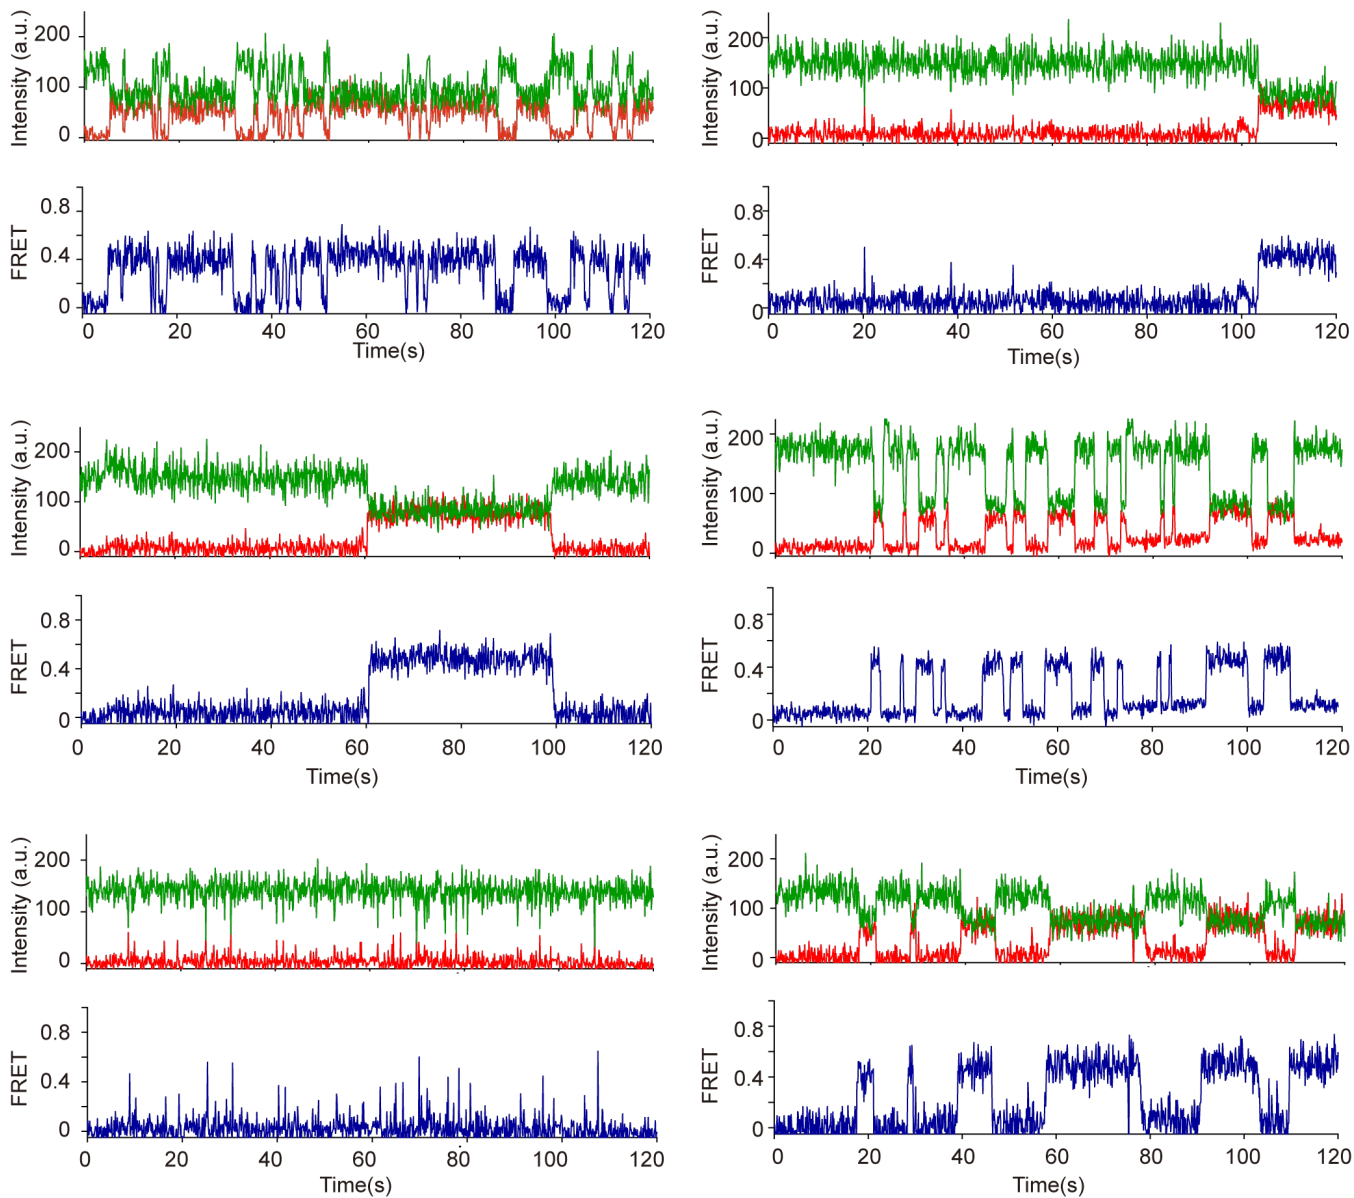

**Figure S3. Representative smFRET trajectories of targeting Cascade with dsDNA<sub>target</sub>. Related to Figure 1.**

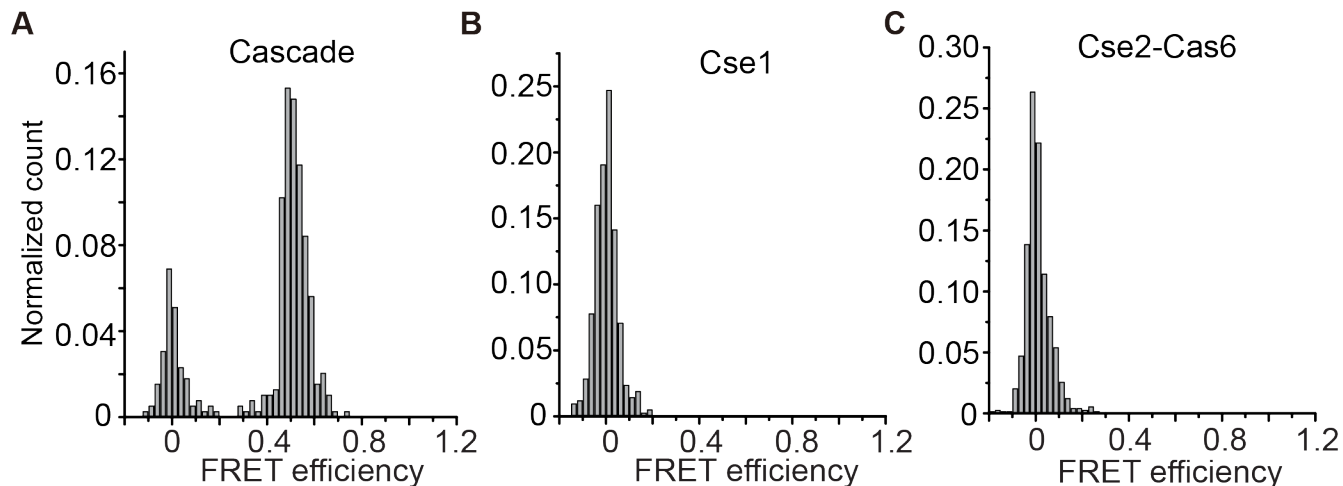

**Figure S4. FRET distribution for whole Cascade, Cse1, and Cse2-Cas6e with dsDNA<sub>trunc</sub>. Related to Figure 1.**

(A-C) FRET histograms for FRET events existed in all extracted traces of Cascade with Cy5 labelled Cse2-Cas6e (A), Cy5 labelled Cse1 (B), and Cy5 labelled Cse2-Cas6e (C). The number of molecules used for FRET histograms was 392 (Cascade), 378 (Cse1), and 400 (Cse2).

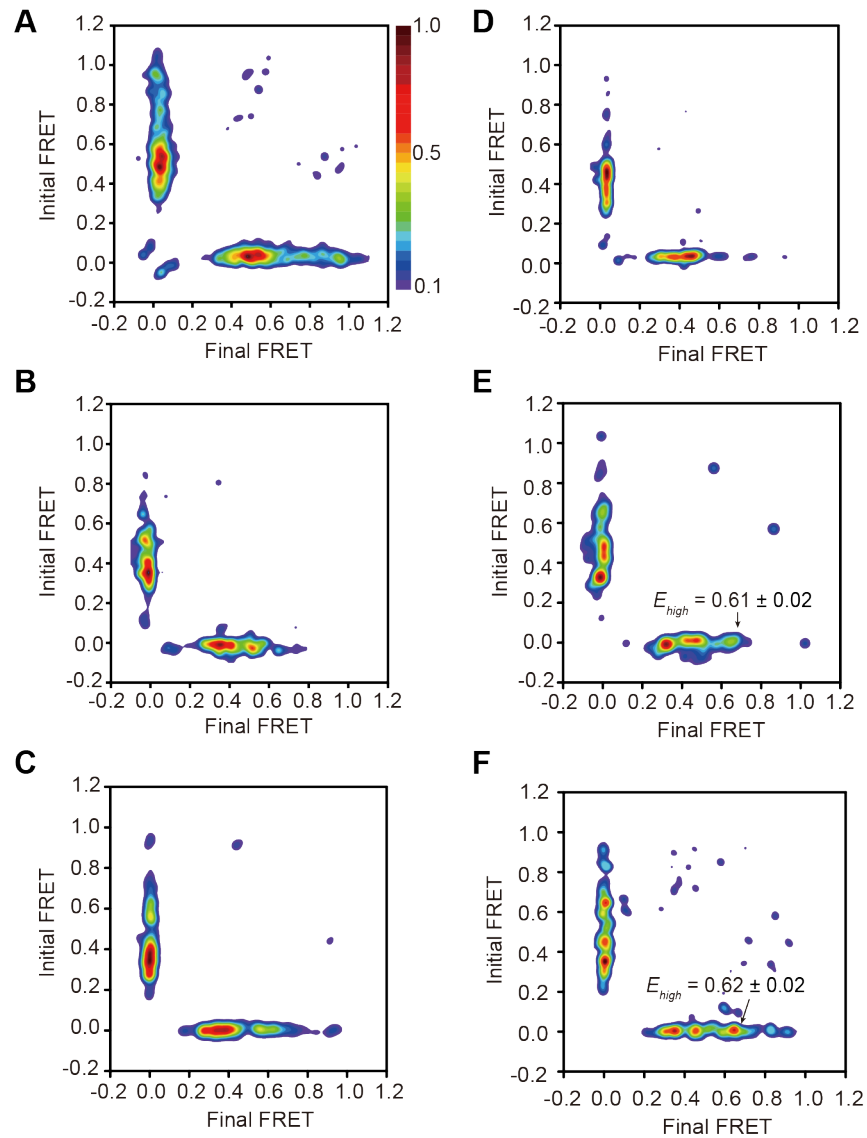

**Figure S5. Transition density plots for Cascade binding to different dsDNA substrates. Related to Figure 2.**

Transition density plots for (A) dsDNA<sub>target</sub> with non-targeting Cascade, (B) dsDNA<sub>0PAM</sub> with non-targeting Cascade, (C) dsDNA<sub>0PAM</sub> with targeting Cascade, (D) dsDNA<sub>1PAM</sub> with non-targeting Cascade, (E) dsDNA<sub>3PAM</sub> with non-targeting Cascade, and (F) dsDNA<sub>1PAM-12bp</sub> with non-targeting Cascade. The number of molecules for each TDP ranged from 1050 to 4,775.

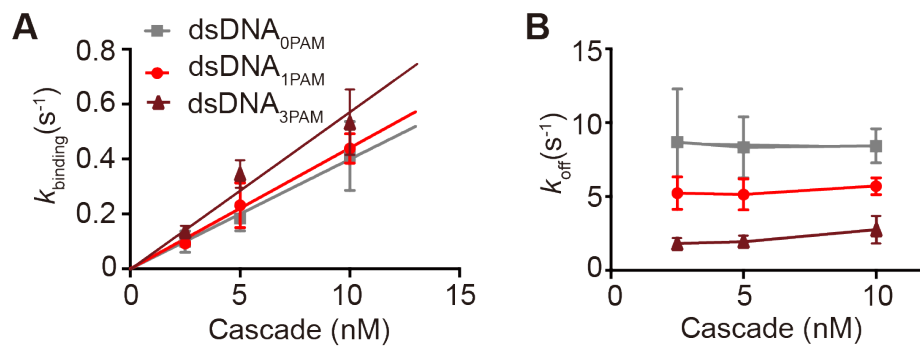

**Figure S6. FRET appearance and disappearance at different Cascade concentrations. Related to Figure 2.**

(A)  $k_{\text{binding}}$  for dsDNA<sub>0PAM</sub>, dsDNA<sub>1PAM</sub> and dsDNA<sub>3PAM</sub> at three different Cascade concentrations (2.5 nM, 5 nM and 10 nM). (B)  $k_{\text{off}}$  for dsDNA<sub>0PAM</sub>, dsDNA<sub>1PAM</sub> and dsDNA<sub>3PAM</sub> at three different Cascade concentrations (2.5 nM, 5 nM and 10 nM).

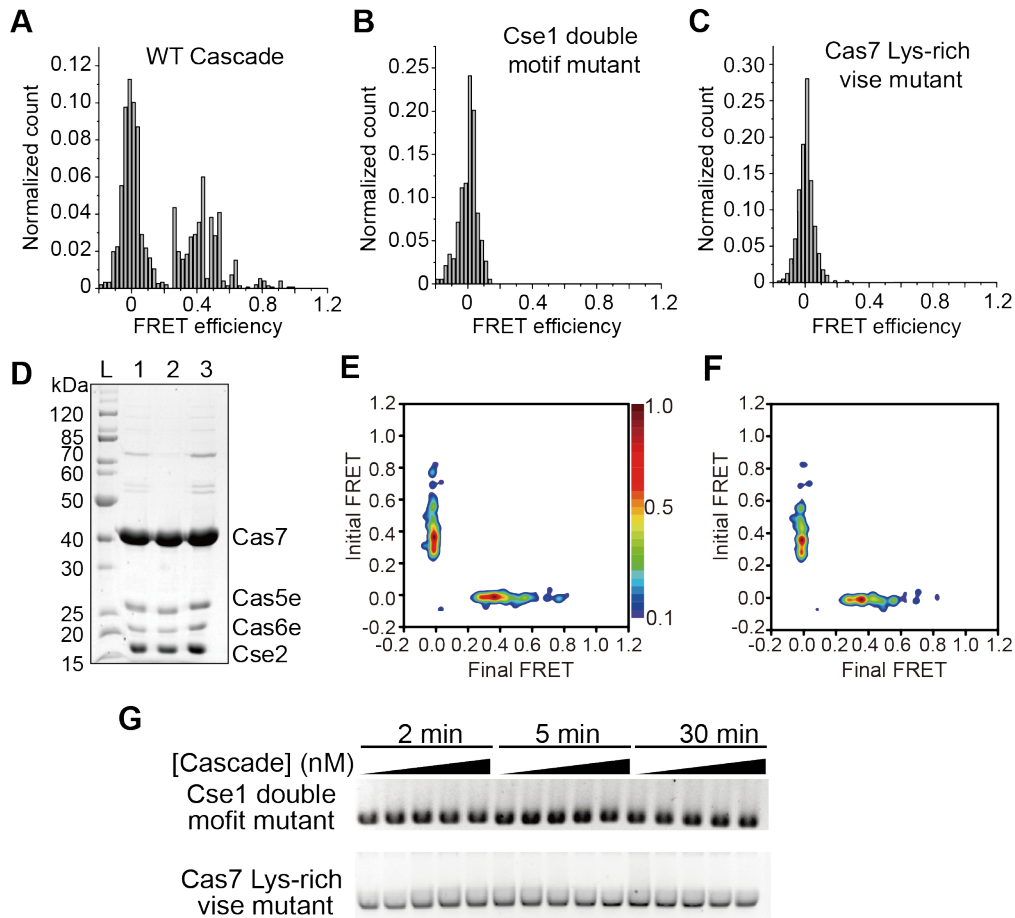

**Figure S7. Cse1 and Cas7 motif mutations abolish target binding. Related to Figure 4.**

(A-C) FRET distribution for (A) WT Cascade, (B) G160A and lysine-rich  $\beta$  hairpin (K289A, K290A, and K296A) double mutation in Cse1, (C) Cas7 quadruple Lys-rich vise mutation (K137A, K138A, K141A and K144A) binding to dsDNA<sub>IPAM</sub>. The number of molecules used for FRET histograms was 1517 (WT Cascade), 850 (Cse1 double mutant), and 744 (Cas7 Lys-rich vise mutant). (D) Coomassie blue-stained SDS-PAGE gel analysis of Cse2-Cas6e. Gel lanes: (1) WT Cse2-Cas6e; (2) WT Cse2-Cas6e with K137A Cas7; (3) WT Cse2-Cas6e with K137A, K138A, K141A and K144A Cas7. (E-F) Transition density plots for Cascade with (E) Cse1 G160A mutation and (F) Cascade with Cse1 Lys-rich  $\beta$  hairpin mutation (K289A, K290A, and K296A) binding to dsDNA<sub>IPAM</sub>. (G) Electrophoretic mobility shift assay for G160A and lysine-rich  $\beta$  hairpin (K289A, K290A, and K296A) double mutation in Cse1 and quadruple Lys-rich vise mutation (K137A, K138A, K141A and K144A) in Cas7 at different time point (2, 5, and 30 min) and various Cascade concentrations (1, 5, 10, 50, and 500 nM).

**Table S1: Plasmids used in this study Related to Experimental procedures.**

| Plasmids      | Description                                                                                                              | Primers         | Source                  |
|---------------|--------------------------------------------------------------------------------------------------------------------------|-----------------|-------------------------|
| EcCse1-pSV272 | <i>cseI</i> expression vector with N-terminal His <sub>6</sub> -MBP-TEV site tag in pSV272                               |                 | (Sashital et al., 2012) |
| pWUR547       | <i>E. coli</i> R44 CRISPR, 7×spacer number 2 in pACYCDuet-1 expression vector used for non-targeting Cascade             |                 | (Brouns et al., 2008)   |
| pX965         | <i>E. coli</i> CRISPR 2 spacer 1 (S2.1) CRISPR template in pACYC-Duet used for targeting Cascade                         |                 | (Xue et al., 2016)      |
| pX1154        | <i>cseI</i> with K289A, K290A, and K296A expression vector with N-terminal His <sub>6</sub> -MBP-TEV site tag in pSV272  | XCY1106+XCY1136 | This study              |
| pX1484        | <i>cseI</i> with G160A expression vector with N-terminal His <sub>6</sub> -MBP-TEV site tag in pSV272                    | XCY1075+XCY1076 | This study              |
| pX996         | Cys-free <i>cas6e</i> in pCDF-1b with no tag                                                                             |                 | (Xue et al., 2016)      |
| pX1169        | Minimal-Cys <i>cse2-cas7-cas5e</i> with N-terminal His <sub>6</sub> -TEV site tag is pET-52b(+)                          |                 | (Xue et al., 2016)      |
| pX1187        | E102C in <i>cas5e</i> in minimal Cys <i>cse2-cas7-cas5e</i> with N-terminal His <sub>6</sub> -TEV site tag is pET-52b(+) | XCY713+XCY718   | This study              |



|        |                                                                                                                                      |                                    |            |
|--------|--------------------------------------------------------------------------------------------------------------------------------------|------------------------------------|------------|
| pX1496 | <i>cas7</i> with K137A, K138A, K141A, K144A in minimal-Cys <i>cse2-cas7-cas5e</i> expression vector pX1169                           | XCY1102+XCY1103                    | This study |
| pX1500 | E102C in <i>cas5e</i> and <i>cas7</i> with K137A, K138A, K141A, K144A in minimal-Cys <i>cse2-cas7-cas5e</i> expression vector pX1169 | XCY1102+XCY1103                    | This study |
| pX1534 | E102C in <i>cas5e</i> and <i>cas7</i> with K137A in minimal-Cys <i>cse2-cas7-cas5e</i> expression vector pX1169                      | XCY1124+XCY1126                    | This study |
| pX1796 | <i>cse1</i> with G160A, K289A, K290A, and K296A expression vector with N-terminal His <sub>6</sub> -MBP-TEV site tag in pSV272       | XCY1106+XCY1136<br>XCY1075+XCY1076 | This study |

**Table S2: Oligonucleotides used for plasmid construction and EMSA. Related to Figure 3 and Experimental procedures.**

| Name    | Sequence (5'-3')                                                                        | Description                                  |
|---------|-----------------------------------------------------------------------------------------|----------------------------------------------|
| XCY798  | TGTACGATTCAAACATGGCGCGAATATCTGAGTGAT<br>GCC                                             | F-E102C minimal-<br>Cys <i>cas5e</i>         |
| XCY713  | ATGACTTTTCAAACCACGGTAATCTTCTCGCGCTCCA<br>AGG                                            | R-E102C minimal-<br>Cys <i>cas5e</i>         |
| XCY1075 | GGTTTTAAAAGCGGTTTACGTGGAGGAAC                                                           | F-G160A <i>cseI</i>                          |
| XCY1076 | TGCACCAAAACCTGGTGCCTGATTGCCTG                                                           | R-G160A <i>cseI</i>                          |
| XCY1136 | GGGGAGGTTGAGGAAGCATTCTTGCTTTCACCACT<br>C                                                | F-K289A, K290A,<br>K296A, <i>cseI</i>        |
| XCY1106 | TGCAGCGACTGTTACCAGACAAGGGGAATG                                                          | R-K289A, K290A,<br>K296A, <i>cseI</i>        |
| XCY1102 | GCTGTTCTTGCTGAAGATATTGCCGCCATACG                                                        | F- K137A, K138A,<br>K141A, K144A <i>cas7</i> |
| XCY1103 | GAGCAGAGCAGCATCATCCAGATTATCAGCCTC                                                       | R-K137A, K138A,<br>K141A, K144A <i>cas7</i>  |
| XCY601  | GGATCCGAATTCGAGCTCGCGAAGGCCAAAACCGGG<br>CAATCGCAAAAAGGCGTAATCGCCTGCAGGTCGACA<br>AGCTTG  | F-Spacer 2.1 non-<br>target strand           |
| XCY602  | CAAGCTTGTCGACCTGCAGGCGATTACGCCTTTTTGC<br>GATTGCCCGGTTTTTGCCTTCGCCGAGCTCGAATTCG<br>GATCC | R-Spacer 2.1 non-<br>target strand           |
| XCY1124 | GAGCAGCTTAGCATCATCCAGATTATCAGCCTC                                                       | F-K137A Cas7                                 |
| XCY1126 | AAAGTTCTTAAGGAAGATATTGCCGCCATACG                                                        | R-K137A Cas7                                 |
| XCY1187 | CCCGCCGCCCGCGAAGAAGAAGAAGAAGAAGAAGA<br>AGAAGAAGAAGAAGAAGAAGAAGAAGCCGCCGCCG<br>CCGT      | F-Competitor with 16<br>AAG                  |
| XCY1188 | ACGGCGGCGGCGGCTTCTTCTTCTTCTTCTTCTTCTC<br>TTCTTCTTCTTCTTCTTCTTCTTCTTCTTCTTCTTCTTCTC      | R-Competitor with 16<br>AAG                  |

|         |                                                                                        |                            |
|---------|----------------------------------------------------------------------------------------|----------------------------|
| XCY1189 | CCCGCCGCCGCCGAAGCCGAAGCCGAAGCCGAAGCC<br>GAAGCCGAAGCCGAAGCCGAAGCCGCCGCCGCCGCC<br>GT     | F-Competitor with 8<br>AAG |
| XCY1190 | ACGGCGGGCGGGCGGGCTTCGGCTTCGGCTTCGGCT<br>TCGGCTTCGGCTTCGGCTTCGGCTTCGGCGGGCGGG<br>G      | R-Competitor with 8<br>AAG |
| XCY1191 | CCCGCCGCCGCCGCCGCCGAAGCCGAAGCCGCCGCC<br>GAAGCCGAAGCCGCCGCCGCCGCCGCCGCCGCCGCC<br>GT     | F-Competitor with 4<br>AAG |
| XCY1192 | ACGGCGGGCGGGGGCGGGCGGGCGGGCGGGCTTCGGCT<br>TCGGCGGGCGGGCTTCGGCTTCGGCGGGCGGGCGGGCG<br>GG | R-Competitor with 4<br>AAG |
| XCY1197 | GTCCGCCGCCGCCGCCGCCACGCCGCCGCCGCCGCC<br>CACGCCGCCGCCGCCGCCGCCGCCGCCGCCGCCGCC<br>CA     | R-Competitor with 0<br>AAG |
| XCY1198 | TGGCGGCGTGCGGGCGGGCGGGCGGGCGGGCGGGC<br>GTGCGGGCGGGCGGGCGGGCGGGCGGGCGGGCGGGC<br>GGAC    | R-Competitor with 0<br>AAG |

**Table S3: Oligonucleotides used for smFRET. Related to Figure 1-2, 4, and Figure S1, 3-7**

| Name    | Sequence (5'-3')                                                                                   | Description                                                                                                                              |
|---------|----------------------------------------------------------------------------------------------------|------------------------------------------------------------------------------------------------------------------------------------------|
| XCY1018 | GTGTATACGTGTGTGATTGGTGGACTGATC<br>GAA/3Bio/                                                        | Biotin anchor                                                                                                                            |
| XCY1019 | /5Cy3/TCTGTGCAGTGCTCGAAGGCAAAAAC<br>CG                                                             | Truncated non-target strand with<br>AAG PAM and S2.1 target, Cy3<br>labelled at 5' end                                                   |
| XCY1407 | /5Cy3/TCTGTGCAGTGCTCGAAGGCAAAAAC<br>CGGGCAATCGCAAAAAGGCGTAATCTGTGG<br>GTG                          | Full length non-target strand with<br>AAG PAM and S2.1 target, Cy3<br>labelled at 5' end                                                 |
| XCY1066 | CGATCAGTCCACCAATCACACACGTATACA<br>CCACCCACAGATTACGCCTTTTTGCGATTGC<br>CCGGTTTTTGCCTTCGAGCACTGCACAGA | Target strand S2.1 AAG, annealed<br>with X1018 and X1019 for<br>dsDNA <sub>trunc</sub> or X1018 and X1407<br>for dsDNA <sub>target</sub> |
| XCY1111 | /5Cy3/ACGCCGCCGCCGCCGCCACCGCC<br>GCCGCATCGCACCAACCCAGTAATCTGTGG<br>GTG                             | All CCG, Cy3 labelled at 5' end                                                                                                          |
| XCY1112 | ATCAGTCCACCAATCACACACGTATACACCA<br>CCCACAGATTACTGGGTTGGTGCGATGCGG<br>CGGCGGTGGCGGCGGCGGCGGCGGCGT   | All CCG, annealed with X1018<br>and X1111 for dsDNA <sub>0PAM</sub>                                                                      |
| XCY1156 | /5Cy3/ACGCCGCCGCCGCCAAGCGCCGCCG<br>CCGCCGCCTCGCACCAACCCAGTAATCTGT<br>GGGT                          | One AAG PAM at 16 <sup>th</sup> position,<br>Cy3 labelled at 5' end                                                                      |
| XCY1157 | ATCAGTCCACCAATCACACACGTATACACAC<br>CCACAGATTACTGGGTTGGTGCGAGGCGGC<br>GGCGGCGGCGCTTCGGCGGCGGCGGCGT  | One AAG PAM at 16 <sup>th</sup> position,<br>annealed with X1156 and X1018<br>for dsDNA <sub>1PAM</sub>                                  |
| XCY1092 | /5Cy3/ACGCCGCCGCCAAGCCAAGCAAGCC<br>GCCGCCATCGCACCAACCCAGTAATCTGTG<br>GGTG                          | Three AAG PAMs, Cy3 labelled<br>at 5' end                                                                                                |

|         |                                                                                                    |                                                                                                        |
|---------|----------------------------------------------------------------------------------------------------|--------------------------------------------------------------------------------------------------------|
| XCY1093 | ATCAGTCCACCAATCACACACGTATAACACCA<br>CCCACAGATTACTGGGTTGGTGCATGGCG<br>GCGGCTTGCTTGGCTTGGCGGCGGCGT   | Three AAG PAMs, annealed with X1092 and X1018 for dsDNA <sub>3PAM</sub>                                |
| X1409   | /5Cy3/ACGCCGCCGCCAAGCCCCGCGCCGCCG<br>CCGCCGCCTCGCACCAACCCAGTAATCTGT<br>GGGT                        | One AAG PAM at 12 <sup>th</sup> position, Cy3 labelled at 5' end                                       |
| X1410   | ATCAGTCCACCAATCACACACGTATAACACAC<br>CCACAGATTACTGGGTTGGTGCAGGGCGGC<br>GGCGGCGGCGCGGGCTTGGCGGCGGCGT | One AAG PAM at 12 <sup>th</sup> position, annealed with X1409 and X1018 for dsDNA <sub>1PAM-12bp</sub> |

## Supplemental Experimental Procedures

### *Plasmid Construction*

K289, K290, and K296 in *cse1* were mutated to alanine using primers XCY1106 and XCY1136 in EcCse1-pSV272. G160 in *cse1* was mutated to alanine using XCY1075 and XCY1076 in EcCse1-pSV272. K137, K138, K141, and K144 in *cas7* were mutated to alanine using XCY1102 and XCY1103 in pX1169 to produce pX1500. K137 in *cas7* was mutated to alanine using XCY1124 and XCY1126 in pX1169 to produce pX1534. E102C was introduced to the *cas5e* gene in the plasmid pX1169 or pX1500 for site-specific labeling of Cas5e using XCY713 and XCY798.

### *Protein purification and Dye labeling*

Minimal-Cys Cse2-Cas6e with different crRNA sequences containing E102C Cas5e was labeled by Cy5-maleimide (Lumiprobe) as previously described (Xue et al., 2016). All labeling reactions were performed in sample storage buffer (20 mM Tris [pH 7.5], 100 mM NaCl, 5% glycerol, and 1 mM TCEP). Cse2-Cas6e (25  $\mu$ M) and Cy5 (200  $\mu$ M) were mixed in 5% DMSO. Reactions were incubated in the dark at 4  $^{\circ}$ C for 1 hr, then quenched by adding 10 mM DTT. Labeled Cse2-Cas6e was separated from free dye using a 10K protein concentrator (Corning), concentrated to 2  $\mu$ M, aliquoted and stored at -80  $^{\circ}$ C. Each labeled Cse2-Cas6e aliquot was only thawed one time. The labelling efficiency of Cse2-Cas6e was calculated by measuring the concentration of Cse2-Cas6e at 280 nm and the dye concentration at 650 nm after labelling. Labelling efficiency of Cse2-Cas6e was consistently greater than 90%.

### *Preparation of dsDNA used for smFRET and EMSA*

Oligos were dissolved in ddH<sub>2</sub>O to 100  $\mu$ M. Two complementary oligos used for EMSA experiments were mixed in annealing buffer (10 mM Tris, pH 7.5, 50 mM NaCl, 1 mM EDTA) in 1:1 ratio. Two complementary oligos and a biotinylated anchor (X1018) used for surface immobilization were mixed in annealing buffer (10 mM Tris, pH 7.5, 50 mM NaCl, 1 mM EDTA) in 1:1:1 ratio (Fig. S1A). Samples were incubated at 95°C for 5 min in a heat block covered by aluminum foil to avoid light. The samples were slow-cooled by turning off the heat block until the block decreased to room temperature (2-3 h). Samples were purified on a 6% native polyacrylamide gel run at 4 °C.

### **Supplemental References**

Brouns, S.J.J., Jore, M.M., Lundgren, M., Westra, E.R., Slijkhuis, R.J.H., Snijders, A.P.L., Dickman, M.J., Makarova, K.S., Koonin, E. V., and Van Der Oost, J. (2008). Small Crispr Rnas Guide Antiviral Defense in Prokaryotes. *Science* (80). 321, 960–964.

Sashital, D.G., Wiedenheft, B., and Doudna, J.A. (2012). Mechanism of Foreign DNA Selection in a Bacterial Adaptive Immune System. *Mol. Cell* 46, 606–615.

Xue, C., Whitis, N.R., and Sashital, D.G. (2016). Conformational Control of Cascade Interference and Priming Activities in CRISPR Immunity. *Mol. Cell* 64, 826–834.
